# Supplementary material for: Aging Is Associated With Multidirectional Changes in Social Cognition: Findings From an Adult Life-Span Sample Ranging From 18 to 101 Years
Source: PubMed Central journal article supplement (PMC9890910; doi:10.1093/geronb/gbac110), 2022-08-19
Supplement: gbac110_suppl_supplementary_material.pdf [file gbac110_suppl_supplementary_material.pdf]

## Supplementary Material

**eTable 1**

*Pearson Correlations Between Each of the Five Cognitive Domains*

|                    | 1 | 2      | 3      | 4      | 5      |
|--------------------|---|--------|--------|--------|--------|
| Processing speed   | 1 | .19*** | .21*** | .43*** | .77*** |
| Attention          |   | 1      | .54*** | .14*   | .32*** |
| Working memory     |   |        | 1      | .24*** | .23*** |
| Episodic memory    |   |        |        | 1      | .48*** |
| Executive function |   |        |        |        | 1      |

$p < .05, p < .001$

**e-Table 2***Regression Analyses with Linear and Quadratic Effects of Age on Each of the Social Cognitive Domains, controlling for Sex and Education*

|                             | Social perception   |                       | Theory of Mind     |                       | Affective Empathy  |                       | Social Behavior  |                       |
|-----------------------------|---------------------|-----------------------|--------------------|-----------------------|--------------------|-----------------------|------------------|-----------------------|
|                             | B                   | <i>t</i> ( <i>p</i> ) | B                  | <i>t</i> ( <i>p</i> ) | B                  | <i>t</i> ( <i>p</i> ) | B                | <i>t</i> ( <i>p</i> ) |
| Education                   | 1.04                | 3.60 (<.001)          | .76                | 3.90 (<.001)          | .03                | 1.29 (.198)           | -.05             | .09 (.931)            |
| Sex                         | 4.70                | 2.47 (.014)           | 2.62               | 2.05 (.041)           | .06                | 0.42 (.676)           | 4.33             | 1.28 (.203)           |
| $\Delta R^2 F$ ( <i>p</i> ) | .05, 9.68 (<.001)   |                       | .05, 9.90 (<.001)  |                       | .01, 0.93 (.397)   |                       | .01, 0.82 (.442) |                       |
| Age(cnt)                    | -.39                | 12.86 (<.001)         | -.23               | 10.40 (<.001)         | .02                | 6.03 (<.001)          | .21              | 3.00 (.003)           |
| Age(cnt) <sup>2</sup>       | -.01                | 6.36 (<.001)          | -.01               | 5.56 (<.001)          | .00                | 1.81 (.072)           | .001             | 0.22 (.823)           |
| $\Delta R^2 F$ ( <i>p</i> ) | .42, 143.77 (<.001) |                       | .33, 97.49 (<.001) |                       | .09, 18.37 (<.001) |                       | .05, 5.07 (.007) |                       |
| $R^2 F$ ( <i>p</i> )        | .47, 80.47 (<.001)  |                       | .38, 56.29 (<.001) |                       | .10, 9.69 (<.001)  |                       | .06, 2.96 (.021) |                       |

**e-Table 3**

*Regression Analyses Examining the Association Between (a) Age and Social Perception (Model 1), (b) Cognitive Function and Social Perception (Model 2), and (c) Age and Social Perception While Accounting for Cognitive Function (Model 3).*

| Independent Variable                        | Model 1            |          |          | Model 2            |          |          | Model 3            |          |          |
|---------------------------------------------|--------------------|----------|----------|--------------------|----------|----------|--------------------|----------|----------|
|                                             | B                  | <i>t</i> | <i>p</i> | B                  | <i>t</i> | <i>p</i> | B                  | <i>t</i> | <i>p</i> |
| Processing Speed                            |                    |          |          | 4.81               | 3.93     | <.001    | 0.98               | 0.71     | .481     |
| Attention                                   |                    |          |          | 1.54               | 1.76     | .080     | 1.65               | 1.95     | .052     |
| Working Memory                              |                    |          |          | -1.50              | 1.69     | .092     | -0.86              | 0.99     | .322     |
| Episodic Memory                             |                    |          |          | 1.98               | 2.27     | .024     | 1.41               | 1.65     | .100     |
| Executive Function                          |                    |          |          | 4.11               | 3.12     | .002     | 2.18               | 1.64     | .101     |
| Age(cnt)                                    | -.36               | 11.45    | <.001    |                    |          |          | -.25               | 5.00     | <.001    |
| Age(cnt) <sup>2</sup>                       | -.01               | 4.73     | <.001    |                    |          |          | -.01               | 3.00     | .003     |
| <i>R</i> <sup>2</sup> <i>F</i> ( <i>p</i> ) | .34, 85.06 (<.001) |          |          | .31, 30.58 (<.001) |          |          | .37, 27.63 (<.001) |          |          |
| $\Delta R^2 F$ ( <i>p</i> )                 |                    |          |          |                    |          |          | .05, 14.22 (<.001) |          |          |

*Note.* *N* = 340. Age(cnt): Age centred at its mean value of 49.20.

**e-Table 4**

Regression Analyses Examining the Association Between (a) Age and ToM (Model 1), (b) Cognitive Function and ToM (Model 2), and (c) Age and ToM While Accounting for Cognitive Function (Model 3).

| Independent Variable                        | Model 1            |          |          | Model 2            |          |          | Model 3            |          |          |
|---------------------------------------------|--------------------|----------|----------|--------------------|----------|----------|--------------------|----------|----------|
|                                             | B                  | <i>t</i> | <i>p</i> | B                  | <i>t</i> | <i>p</i> | B                  | <i>t</i> | <i>p</i> |
| Processing Speed                            |                    |          |          | 2.16               | 2.37     | .018     | -0.51              | 0.50     | .620     |
| Attention                                   |                    |          |          | 1.23               | 1.89     | .060     | 1.37               | 2.18     | .030     |
| Working Memory                              |                    |          |          | -1.62              | 2.46     | .015     | -1.10              | 1.71     | .089     |
| Episodic Memory                             |                    |          |          | 1.70               | 2.62     | .009     | 1.19               | 1.87     | .062     |
| Executive Function                          |                    |          |          | 3.59               | 3.65     | <.001    | 2.05               | 2.08     | .038     |
| Age(cnt)                                    | -.23               | 9.71     | <.001    |                    |          |          | -0.20              | 7.58     | <.001    |
| Age(cnt) <sup>2</sup>                       | -.01               | 5.62     | <.001    |                    |          |          | -0.01              | 4.89     | <.001    |
| <i>R</i> <sup>2</sup> <i>F</i> ( <i>p</i> ) | .30, 71.12 (<.001) |          |          | .27, 24.83 (<.001) |          |          | .33, 23.52 (<.001) |          |          |
| $\Delta R^2 F$ ( <i>p</i> )                 |                    |          |          |                    |          |          | .06, 15.03 (<.001) |          |          |

Note. *N* = 340. Age(cnt): Age centred at its mean value of 49.20.

**e-Table 5**

*Regression Analyses Examining the Association Between (a) Age and Affective Empathy (Model 1), (b) Cognitive Function and Affective Empathy (Model 2), and (c) Age and Affective Empathy While Accounting for Cognitive Function (Model 3).*

| Independent Variable                        | Model 1            |          |          | Model 2          |          |          | Model 3          |          |          |
|---------------------------------------------|--------------------|----------|----------|------------------|----------|----------|------------------|----------|----------|
|                                             | B                  | <i>t</i> | <i>p</i> | B                | <i>t</i> | <i>p</i> | B                | <i>t</i> | <i>p</i> |
| Processing Speed                            |                    |          |          | -.33             | 2.67     | .008     | -.12             | 0.87     | .387     |
| Attention                                   |                    |          |          | -.17             | 1.91     | .057     | -.15             | 1.70     | .089     |
| Working Memory                              |                    |          |          | -.02             | 0.19     | .851     | -.02             | 0.21     | .831     |
| Episodic Memory                             |                    |          |          | -.05             | 0.52     | .606     | -.06             | 0.71     | .479     |
| Executive Function                          |                    |          |          | .10              | 0.71     | .476     | .12              | 0.86     | .392     |
| Age(cnt)                                    | .02                | 5.48     | <.001    |                  |          |          | .01              | 2.85     | .005     |
| Age(cnt) <sup>2</sup>                       | .00                | 2.07     | .039     |                  |          |          | .00              | 1.88     | .062     |
| <i>R</i> <sup>2</sup> <i>F</i> ( <i>p</i> ) | .09, 15.97 (<.001) |          |          | .06, 4.37 (.001) |          |          | .10, 5.38 (.001) |          |          |
| $\Delta R^2 F$ ( <i>p</i> )                 |                    |          |          |                  |          |          | .04, 7.50 (.001) |          |          |

*Note.* Age(cnt): Age centred at its mean value of 49.20. *N* = 340

**e-Table 6**

*Hierarchical Regression Analysis for the Effect of Age on Social Behavior, Controlling for Cognitive Domains.*

| Independent Variable                        | Model 1          |          |          | Model 2          |          |          | Model 3          |          |          |
|---------------------------------------------|------------------|----------|----------|------------------|----------|----------|------------------|----------|----------|
|                                             | B                | <i>t</i> | <i>p</i> | B                | <i>t</i> | <i>p</i> | B                | <i>t</i> | <i>p</i> |
| Processing Speed                            |                  |          |          | -7.20            | 2.41     | .017     | -2.49            | 0.69     | .491     |
| Attention                                   |                  |          |          | 2.18             | 1.08     | .281     | 2.27             | 1.13     | .261     |
| Working Memory                              |                  |          |          | -1.32            | 0.63     | .533     | -1.54            | 0.74     | .463     |
| Episodic Memory                             |                  |          |          | 2.32             | 1.15     | .252     | 2.99             | 1.47     | .144     |
| Executive Function                          |                  |          |          | -.02             | 0.01     | .995     | 1.35             | 0.38     | .702     |
| Age(cnt)                                    | .26              | 3.70     | <.001    |                  |          |          | .28              | 2.30     | .023     |
| Age(cnt) <sup>2</sup>                       | .00              | 0.74     | .463     |                  |          |          | .00              | 0.90     | .371     |
| <i>R</i> <sup>2</sup> <i>F</i> ( <i>p</i> ) | .08, 7.51 (.001) |          |          | .08, 2.75 (.020) |          |          | .11, 2.77 (.009) |          |          |
| $\Delta R^2 F$ ( <i>p</i> )                 |                  |          |          |                  |          |          | .03, 2.69 (.071) |          |          |

*Note.* *N* = 174. Age(cnt): Age centred at its mean value of 49.20.
